# Supplementary material
Source: PubMed Central journal article supplement (PMC4286529)
Supplement: NIHMS593237-supplement-1.pdf [file NIHMS593237-supplement-1.pdf]

Supplementary Figure S1

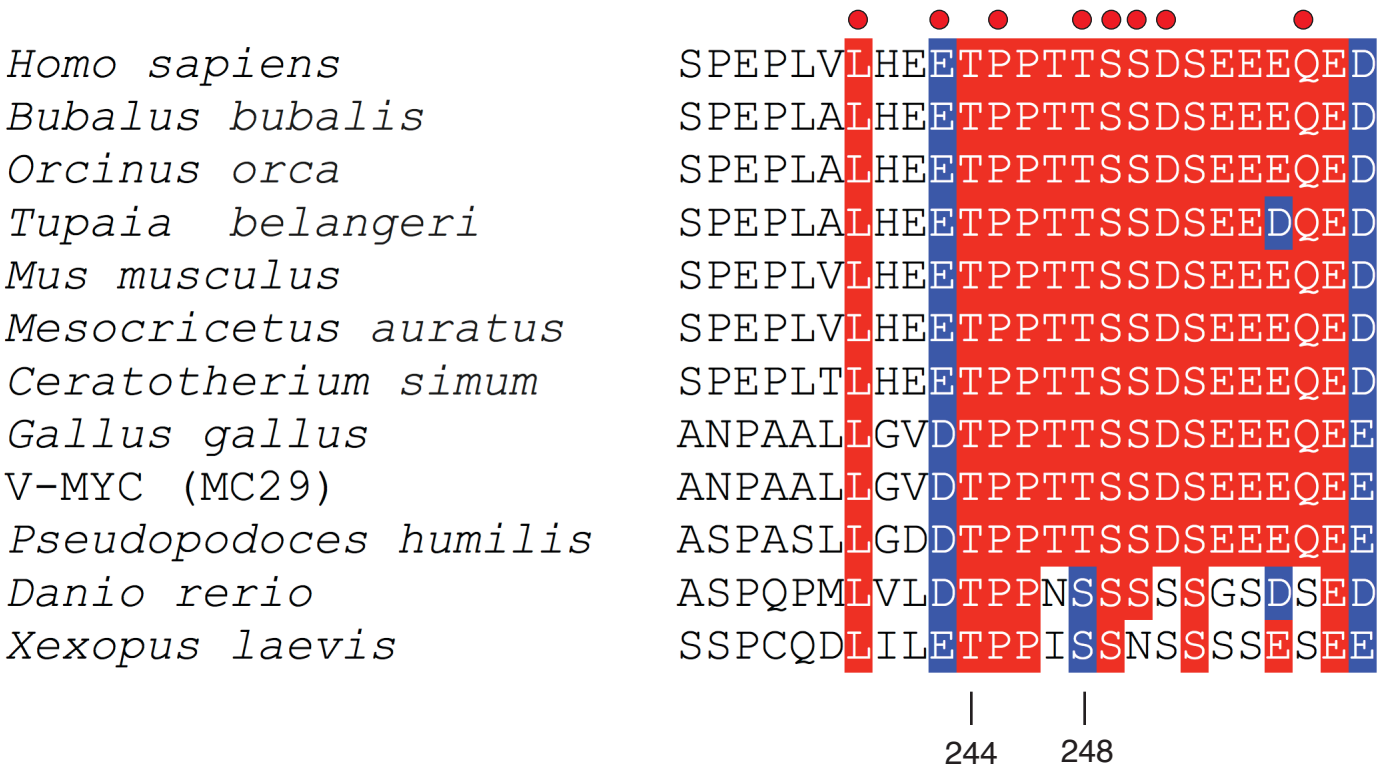

**Supplementary Figure S1.** Alignment of representative vertebrate c-MYC proteins in the segment surrounding residues 243–249 of human c-MYC. The viral MYC sequence from MC29 is also shown. The relative positions of human c-MYC residues 244 and 248 are indicated. Residues that are identical in >75% of the proteins are boxed red; those that are non-identical but conserved are boxed blue. Red circles at the top of the figure indicate the position of tumor-derived mutations (from Supplemental Table S1).
