# Supplementary material
Source: PubMed Central journal article supplement (PMC4286529)
Supplement: NIHMS593237-supplement-3.pdf [file NIHMS593237-supplement-3.pdf]

## Supplementary Figure S3

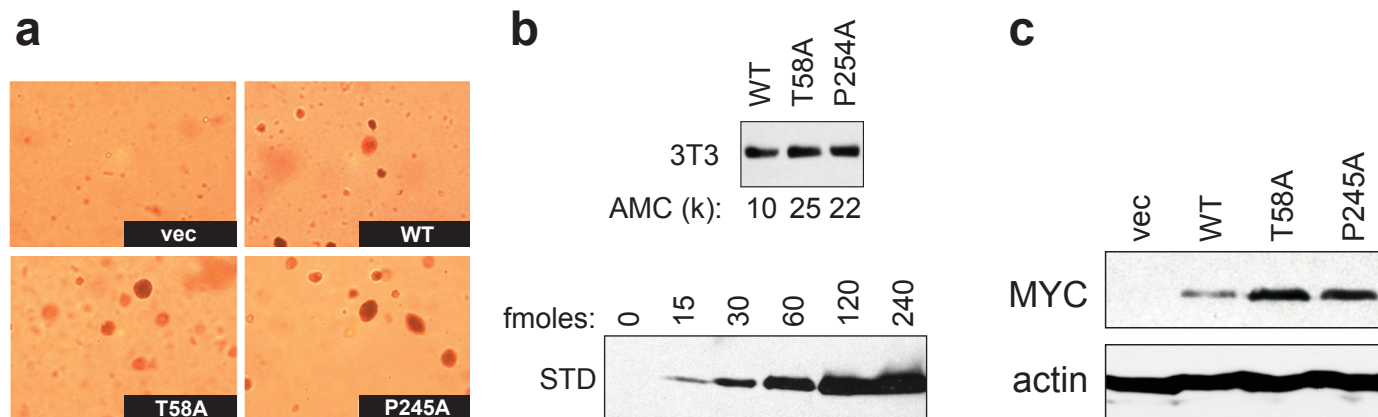

**Supplementary Figure S3.** Analysis of mutant MYC proteins in cell culture. **(a)** Photograph of representative colonies from NIH3T3 cell soft agar assays presented in Figure 3a. **(b)** Western blot of MYC expression in NIH3T3 cells used in Figure 3a (top panel). The “average number of molecules per cell” (AMC; in thousands) for MYC was calculated by Odyssey imaging of these Western blots against a parallel set of standards of recombinant MYC (lower panel). **(c)** Western blot of exogenous MYC expression in transduced hematopoietic stem cells grown under B-cell promoting conditions (in Figure 3b). See Supplementary Methods for more details.
