# Supplementary material
Source: PubMed Central journal article supplement (PMC4286529)
Supplement: NIHMS593237-supplement-6.pdf [file NIHMS593237-supplement-6.pdf]

## Supplementary Figure S6

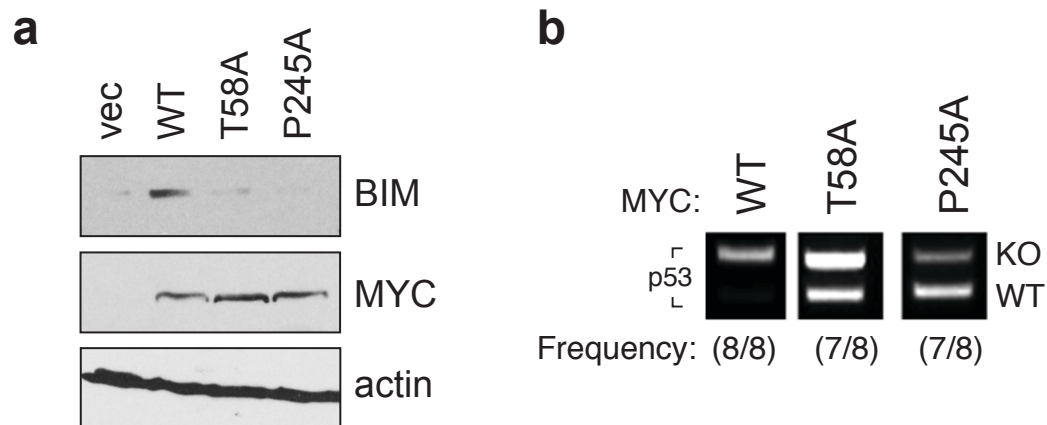

**Supplementary Figure S6.** The P245A mutant mirrors T58A in the failure to induce Bim and to select for loss of p53. **(a)** Western blot analysis of Bim expression in early passage MEFs expressing either vector control (vec) or different versions of MYC. **(b)** PCR analysis of either p53-WT (WT) or p53-null (KO) alleles in tumors derived from p53<sup>+/-</sup> HSCs expressing the indicated MYC isoforms. Frequency indicates the observed incidence of the phenotype shown. See Supplementary Methods for more details.
