# Supplementary material
Source: PubMed Central journal article supplement (PMC4286529)
Supplement: NIHMS593237-supplement-7.pdf [file NIHMS593237-supplement-7.pdf]

**SUPPLEMENTARY TABLE 1. Compilation of c-MYC missense mutations in Burkitt's and other lymphomas.**

| Source                    | Mutation(s)                                                 | Publication (PMID) | Notes                                                                         |
|---------------------------|-------------------------------------------------------------|--------------------|-------------------------------------------------------------------------------|
| Ly67 cell line (BL)       | S62P                                                        | 6419122            | Rabbitts et al., 1983.                                                        |
| LL3 bursal lymphoma cells | P63T                                                        | 6322173            | Westaway et al., 1984. Chicken Myc                                            |
| CA46 cell line (BL)       | V5I, P57S, P60H, L179V, Q306H                               | 3921823            | Showe et al., 1985.                                                           |
| Ly65 cell line (BL)       | Q33H, Q36H, E39D, K51R, 62P, S64R, C70W, frameshift 136–159 | 3517879            | Murphy et al., 1986.                                                          |
| BL1                       | A44V, S46N, T58N                                            | 8220424            | Bhatia et al., 1993. These are patient BL samples. Sequenced second exon only |
| BL2                       | P59S                                                        | 8220424            | Bhatia et al., 1993. These are patient BL samples. Sequenced second exon only |
| BL4                       | S62P, P63L, S64T                                            | 8220424            | Bhatia et al., 1993. These are patient BL samples. Sequenced second exon only |
| BL5                       | Q34H, P63S                                                  | 8220424            | Bhatia et al., 1993. These are patient BL samples. Sequenced second exon only |
| BL7                       | A44G, D48N, L56P, T58A, P63L                                | 8220424            | Bhatia et al., 1993. These are patient BL samples. Sequenced second exon only |
| BL9                       | P41L                                                        | 8220424            | Bhatia et al., 1993. These are patient BL samples. Sequenced second exon only |
| BL10                      | P115L                                                       | 8220424            | Bhatia et al., 1993. These are patient BL samples. Sequenced second exon only |
| BL11                      | E39D, P60A                                                  | 8220424            | Bhatia et al., 1993. These are patient BL samples. Sequenced second exon only |
| BL12                      | N86S                                                        | 8220424            | Bhatia et al., 1993. These are patient BL samples. Sequenced second exon only |
| BL13                      | P245A                                                       | 8220424            | Bhatia et al., 1993. These are patient BL samples. Sequenced second exon only |
| BL14                      | Q37H, T58I                                                  | 8220424            | Bhatia et al., 1993. These are patient BL samples. Sequenced second exon only |
| BL17                      | Q37E, E39D, A44V, T58I                                      | 8220424            | Bhatia et al., 1993. These are patient BL samples. Sequenced second exon only |
| BL18                      | E54V, S92T, S175R                                           | 8220424            | Bhatia et al., 1993. These are patient BL samples. Sequenced second exon only |
| BL19                      | P57S, P60H                                                  | 8220424            | Bhatia et al., 1993. These are patient BL samples. Sequenced second exon only |
| BL20                      | P57S                                                        | 8220424            | Bhatia et al., 1993. These are patient BL samples. Sequenced second exon only |
| BL21                      | N86T                                                        | 8220424            | Bhatia et al., 1993. These are patient BL samples. Sequenced second exon only |
| BL22                      | S95A                                                        | 8220424            | Bhatia et al., 1993. These are patient BL samples. Sequenced second exon only |
| BL23                      | S92N                                                        | 8220424            | Bhatia et al., 1993. These are patient BL samples. Sequenced second exon only |
| BL24                      | P57S, Q98H, I129L                                           | 8220424            | Bhatia et al., 1993. These are patient BL samples. Sequenced second exon only |
| BL25                      | E39D                                                        | 8220424            | Bhatia et al., 1993. These are patient BL samples. Sequenced second exon only |
| BL27                      | S62P, P245A                                                 | 8220424            | Bhatia et al., 1993. These are patient BL samples. Sequenced second exon only |
| BL28                      | Q36L, P57T, N86T                                            | 8220424            | Bhatia et al., 1993. These are patient BL samples. Sequenced second exon only |
| BL29                      | S92N                                                        | 8220424            | Bhatia et al., 1993. These are patient BL samples. Sequenced second exon only |
| BL30                      | P59A                                                        | 8220424            | Bhatia et al., 1993. These are patient BL samples. Sequenced second exon only |
| AIDS-NHL 1                | E39D                                                        | 8043869            | Bhatia et al., 1994. AIDS-associated Non-Hodgkins lymphomas                   |
| AIDS-NHL 4                | P57A                                                        | 8043869            | Bhatia et al., 1994. AIDS-associated Non-Hodgkins lymphomas                   |
| AIDS-NHL 5                | L149V, T248A                                                | 8043869            | Bhatia et al., 1994. AIDS-associated Non-Hodgkins lymphomas                   |
| AIDS-NHL 8                | P60S                                                        | 8043869            | Bhatia et al., 1994. AIDS-associated Non-Hodgkins lymphomas                   |
| AIDS-NHL 9                | T58A                                                        | 8043869            | Bhatia et al., 1994. AIDS-associated Non-Hodgkins lymphomas                   |
| AIDS-NHL 14               | P57T                                                        | 8043869            | Bhatia et al., 1994. AIDS-associated Non-Hodgkins lymphomas                   |
| AIDS-NHL 16               | P57S                                                        | 8043869            | Bhatia et al., 1994. AIDS-associated Non-Hodgkins lymphomas                   |
| AIDS-NHL 23               | H292Q                                                       | 8043869            | Bhatia et al., 1994. AIDS-associated Non-Hodgkins lymphomas                   |
| A1                        | T58A                                                        | 8012955            | Clark et al., 1994. AIDS-associated lymphomas                                 |
| A4                        | D87G, I129L                                                 | 8012955            | Clark et al., 1994. AIDS-associated lymphomas                                 |
| A5                        | L56V, P57T                                                  | 8012955            | Clark et al., 1994. AIDS-associated lymphomas                                 |
| A6                        | T58D                                                        | 8012955            | Clark et al., 1994. AIDS-associated lymphomas                                 |
| A12                       | L176M                                                       | 8012955            | Clark et al., 1994. AIDS-associated lymphomas                                 |
| A21                       | S71Y, L82H, Δ115–120                                        | 8012955            | Clark et al., 1994. AIDS-associated lymphomas                                 |
| D4                        | N127D, I129L                                                | 8012955            | Clark et al., 1994. <i>De novo</i> lymphoma                                   |
| Eli cell line             | E55D, T58S, P59S, S64K                                      | 8562172            | Axelsson et al., 1995. BL cell lines                                          |
| P3HR1 cell line           | P57S                                                        | 8562172            | Axelsson et al., 1995. BL cell lines                                          |
| Chep cell line            | P60S                                                        | 8562172            | Axelsson et al., 1995. BL cell lines                                          |
| Rael cell line            | T58N                                                        | 8562172            | Axelsson et al., 1995. BL cell lines                                          |
| Akata cell line           | P60F                                                        | 8562172            | Axelsson et al., 1995. BL cell lines                                          |
| Mutu159 cell line         | T58N                                                        | 8562172            | Axelsson et al., 1995. BL cell lines                                          |
| Mutu1148 cell line        | T58N                                                        | 8562172            | Axelsson et al., 1995. BL cell lines                                          |
| Mutu1216 cell line        | T58N                                                        | 8562172            | Axelsson et al., 1995. BL cell lines                                          |
| BL2                       | C70T                                                        | 16094360           | Hemann et al., 2005. BL patient samples. Full Myc sequencing                  |
| BL3                       | T58I                                                        | 16094360           | Hemann et al., 2005. BL patient samples. Full Myc sequencing                  |
| BL4                       | S203I                                                       | 16094360           | Hemann et al., 2005. BL patient samples. Full Myc sequencing                  |
| BL12                      | T58I, S92T, S114G, S203T                                    | 16094360           | Hemann et al., 2005. BL patient samples. Full Myc sequencing                  |
| BL13                      | D118V                                                       | 16094360           | Hemann et al., 2005. BL patient samples. Full Myc sequencing                  |

**SUPPLEMENTARY TABLE 1 (cont'd). Compilation of c-MYC missense mutations in Burkitt's and other lymphomas.**

| Source            | Mutation(s)                                                                                      | Publication (PMID) | Notes                                                                        |
|-------------------|--------------------------------------------------------------------------------------------------|--------------------|------------------------------------------------------------------------------|
| BL14              | D26G, F93L, F138T, V145L, S182G                                                                  | 16094360           | Hemann et al., 2005. BL patient samples. Full Myc sequencing                 |
| BL17              | F31L, P191S                                                                                      | 16094360           | Hemann et al., 2005. BL patient samples. Full Myc sequencing                 |
| BL18              | P60S                                                                                             | 16094360           | Hemann et al., 2005. BL patient samples. Only first 90 aa of Myc sequenced   |
| BL19              | P57T                                                                                             | 16094360           | Hemann et al., 2005. BL patient samples. Only first 90 aa of Myc sequenced   |
| BL20              | P57S                                                                                             | 16094360           | Hemann et al., 2005. BL patient samples. Only first 90 aa of Myc sequenced   |
| BL21              | T58A                                                                                             | 16094360           | Hemann et al., 2005. BL patient samples. Only first 90 aa of Myc sequenced   |
| BL23              | P60S                                                                                             | 16094360           | Hemann et al., 2005. BL patient samples. Only first 90 aa of Myc sequenced   |
| BL25              | P57S                                                                                             | 16094360           | Hemann et al., 2005. BL patient samples. Only first 90 aa of Myc sequenced   |
| BL26              | T58A                                                                                             | 16094360           | Hemann et al., 2005. BL patient samples. Only first 90 aa of Myc sequenced   |
| BL2               | Q35H, S175N                                                                                      | 22885699           | Schmitz et al. 2011. Derived from RNAseq and validated by Sanger             |
| BL30              | Q35H, T58I, G90D, S203N                                                                          | 22885699           | Schmitz et al. 2011. Derived from RNAseq and validated by Sanger             |
| BL41              | C25W, L149V, D251N                                                                               | 22885699           | Schmitz et al. 2011. Derived from RNAseq and validated by Sanger             |
| BL58              | P2S, V5A, S6T, R10K, E39D, P42S, A44V,                                                           | 22885699           | Schmitz et al. 2011. Derived from RNAseq and validated by Sanger             |
| BL70              | T58I                                                                                             | 22885699           | Schmitz et al. 2011. Derived from RNAseq and validated by Sanger             |
| CA46              | V5I, P60H, L178V, Q306H                                                                          | 22885699           | Schmitz et al. 2011. Derived from RNAseq and validated by Sanger             |
| Raji cell line    | S6T, F7I, R10K, R66H, G88D, S114N, D120G, L149V, C171S, D180N, I189M, S203R, S230A, P245S, S249T | 22885699           | Schmitz et al. 2011. Derived from RNAseq and validated by Sanger             |
| SLN2386           | S249N                                                                                            | 22885699           | Schmitz et al. 2011. Derived from RNAseq and validated by Sanger             |
| SLN2389           | F115L, S249N                                                                                     | 22885699           | Schmitz et al. 2011. Derived from RNAseq and validated by Sanger             |
| SLN2392           | P290H                                                                                            | 22885699           | Schmitz et al. 2011. Derived from RNAseq and validated by Sanger             |
| SLN2402           | A154G                                                                                            | 22885699           | Schmitz et al. 2011. Derived from RNAseq and validated by Sanger             |
| SLN2406           | E39D, S64R, L69V, S172C                                                                          | 22885699           | Schmitz et al. 2011. Derived from RNAseq and validated by Sanger             |
| SLN2430           | P60A, E104D, F138C                                                                               | 22885699           | Schmitz et al. 2011. Derived from RNAseq and validated by Sanger             |
| SLN2431           | C70W                                                                                             | 22885699           | Schmitz et al. 2011. Derived from RNAseq and validated by Sanger             |
| SLN2432           | Y22H, S62P                                                                                       | 22885699           | Schmitz et al. 2011. Derived from RNAseq and validated by Sanger             |
| SLN2433           | E39D, T58N                                                                                       | 22885699           | Schmitz et al. 2011. Derived from RNAseq and validated by Sanger             |
| SLN2443           | F138S, C171Y, L240F                                                                              | 22885699           | Schmitz et al. 2011. Derived from RNAseq and validated by Sanger             |
| SLN2448           | S250R                                                                                            | 22885699           | Schmitz et al. 2011. Derived from RNAseq and validated by Sanger             |
| SLN2523           | F138S, F124L                                                                                     | 22885699           | Schmitz et al. 2011. Derived from RNAseq and validated by Sanger             |
| SLN2524           | A44T, A150D, S175N                                                                               | 22885699           | Schmitz et al. 2011. Derived from RNAseq and validated by Sanger             |
| SLN2531           | L149V                                                                                            | 22885699           | Schmitz et al. 2011. Derived from RNAseq and validated by Sanger             |
| SLN2539           | P60A                                                                                             | 22885699           | Schmitz et al. 2011. Derived from RNAseq and validated by Sanger             |
| Thomas cell line  | T8S, Q36L, T95P, A183V                                                                           | 22885699           | Schmitz et al. 2011. Derived from RNAseq and validated by Sanger             |
| BL-1              | S175N, S373R                                                                                     | 23091298           | Giulino-Roth et al. 2012. Targeted genome resequencing of BL patient samples |
| BL-4              | T248I                                                                                            | 23091298           | Giulino-Roth et al. 2012. Targeted genome resequencing of BL patient samples |
| BL-5              | D97G, S175R                                                                                      | 23091298           | Giulino-Roth et al. 2012. Targeted genome resequencing of BL patient samples |
| BL-8              | H359R, N360S                                                                                     | 23091298           | Giulino-Roth et al. 2012. Targeted genome resequencing of BL patient samples |
| BL-13             | V5G, E29D                                                                                        | 23091298           | Giulino-Roth et al. 2012. Targeted genome resequencing of BL patient samples |
| BL-14             | V5A, S64R, V111A, S114N, N127K, E243R                                                            | 23091298           | Giulino-Roth et al. 2012. Targeted genome resequencing of BL patient samples |
| BL-15             | S6T, T8A, E39D, T95S, V111M, I125M, Q131H, F138C, K148T, V194L, S203N                            | 23091298           | Giulino-Roth et al. 2012. Targeted genome resequencing of BL patient samples |
| BL-19             | F138S                                                                                            | 23091298           | Giulino-Roth et al. 2012. Targeted genome resequencing of BL patient samples |
| BL-20             | P59A                                                                                             | 23091298           | Giulino-Roth et al. 2012. Targeted genome resequencing of BL patient samples |
| BL-21             | V5L, F93I, F138V, L149V, Q179H, S182R, S204T                                                     | 23091298           | Giulino-Roth et al. 2012. Targeted genome resequencing of BL patient samples |
| BL-25             | N4K                                                                                              | 23091298           | Giulino-Roth et al. 2012. Targeted genome resequencing of BL patient samples |
| BL-26             | S249R                                                                                            | 23091298           | Giulino-Roth et al. 2012. Targeted genome resequencing of BL patient samples |
| BL-28             | Y74H, L149V, del 203-214, P245A                                                                  | 23091298           | Giulino-Roth et al. 2012. Targeted genome resequencing of BL patient samples |
| BL-29             | S6N, F138S                                                                                       | 23091298           | Giulino-Roth et al. 2012. Targeted genome resequencing of BL patient samples |
| Namatwa cell line | S249R                                                                                            | 23143597           | Love et al. 2012. Exome resequencing and validated by Sanger                 |
| JJJoye cell line  | Y12S, Q98H                                                                                       | 23143597           | Love et al. 2012. Exome resequencing and validated by Sanger                 |
| EB3 cell line     | F138S                                                                                            | 23143597           | Love et al. 2012. Exome resequencing and validated by Sanger                 |
| 1102              | S18F                                                                                             | 23143597           | Love et al. 2012. Exome resequencing and validated by Sanger                 |
| 667               | S18R                                                                                             | 23143597           | Love et al. 2012. Exome resequencing and validated by Sanger                 |
| 513               | S6R, C188W                                                                                       | 23143597           | Love et al. 2012. Exome resequencing and validated by Sanger                 |
| 744               | S6R                                                                                              | 23143597           | Love et al. 2012. Exome resequencing and validated by Sanger                 |
| 1059              | L14V                                                                                             | 23143597           | Love et al. 2012. Exome resequencing and validated by Sanger                 |
| 1060              | T58N, E64N, D221N                                                                                | 23143597           | Love et al. 2012. Exome resequencing and validated by Sanger                 |
| 479               | T58N                                                                                             | 23143597           | Love et al. 2012. Exome resequencing and validated by Sanger                 |
| 672               | P72A, S175T                                                                                      | 23143597           | Love et al. 2012. Exome resequencing and validated by Sanger                 |
| 475               | V75A                                                                                             | 23143597           | Love et al. 2012. Exome resequencing and validated by Sanger                 |
| 674               | A76V                                                                                             | 23143597           | Love et al. 2012. Exome resequencing and validated by Sanger                 |

**SUPPLEMENTARY TABLE 1 (cont'd). Compilation of c-MYC missense mutations in Burkitt's and other lymphomas.**

| Source | Mutation(s)                | Publication (PMID) | Notes                                                        |
|--------|----------------------------|--------------------|--------------------------------------------------------------|
| 1090   | F138S, A154T               | 23143597           | Love et al. 2012. Exome resequencing and validated by Sanger |
| 515    | F138S                      | 23143597           | Love et al. 2012. Exome resequencing and validated by Sanger |
| 516    | F138S                      | 23143597           | Love et al. 2012. Exome resequencing and validated by Sanger |
| 668    | F138S, S249N, V330P, F374R | 23143597           | Love et al. 2012. Exome resequencing and validated by Sanger |
| 675    | F138S                      | 23143597           | Love et al. 2012. Exome resequencing and validated by Sanger |
| 676    | L176F, S203G, S249N, Q256S | 23143597           | Love et al. 2012. Exome resequencing and validated by Sanger |
| 698    | S203T                      | 23143597           | Love et al. 2012. Exome resequencing and validated by Sanger |
| 510    | S249N                      | 23143597           | Love et al. 2012. Exome resequencing and validated by Sanger |
